# Supplementary material
Source: Springer Nature journal article supplement (https://www.springermedizin.de/resource/supplementary/13256_2012_2578_MOESM8_ESM.pdf/9649986)

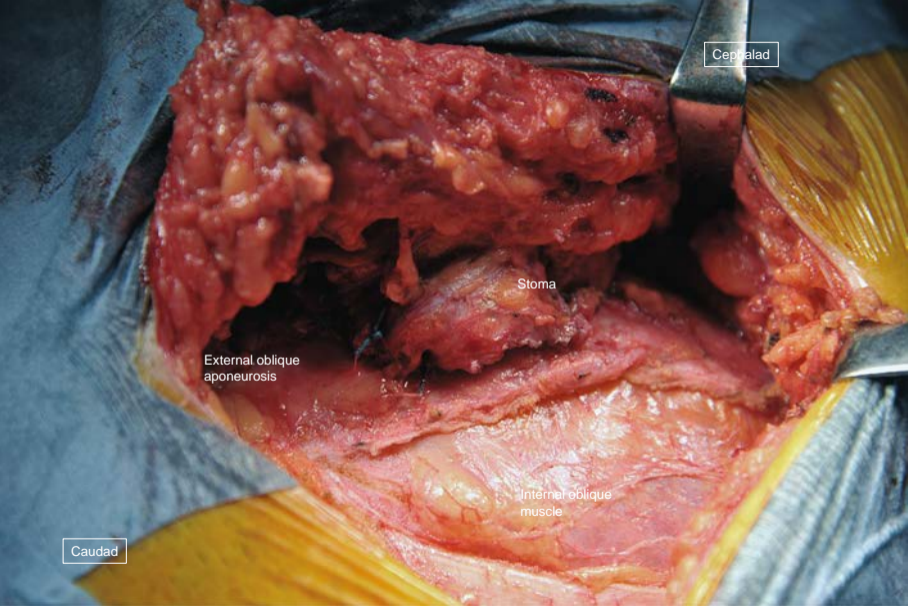

Cephalad

Stoma

External oblique  
aponeurosis

Internal oblique  
muscle

Caudad

Supplement: MOESM8 [file 9649986]
